# Supplementary material
Source: HighWire-hosted journal article supplement (http://www.cmaj.ca/highwire/filestream/58903/field_highwire_adjunct_files/2/angio-antoniou-3-at.pdf)
Supplement: angio-antoniou-3-at.pdf [file angio-antoniou-3-at.pdf]

**Appendix 3 (as supplied by the authors): Primary and secondary analyses with and without adjustment for angiotensin receptor blocker dose**

|                                                         | <b>Adjusted hazard ratio<br/>(95% CI) (without dose)</b> | <b>Adjusted hazard ratio<br/>(95% CI) (with dose as<br/>time-dependent covariate)</b> |
|---------------------------------------------------------|----------------------------------------------------------|---------------------------------------------------------------------------------------|
| <b>Primary analysis</b>                                 |                                                          |                                                                                       |
| Irbesartan (reference)                                  | 1.00                                                     | 1.00                                                                                  |
| Telmisartan                                             | 0.85 (0.74 to 0.97)                                      | 0.85 (0.73 to 0.98)                                                                   |
| Candesartan                                             | 0.99 (0.89 to 1.11)                                      | 1.01 (0.89 to 1.15)                                                                   |
| Losartan                                                | 0.93 (0.83 to 1.05)                                      | 0.96 (0.83 to 1.10)                                                                   |
| Valsartan                                               | 0.86 (0.77 to 0.96)                                      | 0.88 (0.77 to 1.00)                                                                   |
| <b>Secondary analysis #1:<br/>Myocardial infarction</b> |                                                          |                                                                                       |
| Irbesartan (reference)                                  | 1.00                                                     | 1.00                                                                                  |
| Telmisartan                                             | 0.92 (0.72 to 1.17)                                      | 0.99 (0.79 to 1.26)                                                                   |
| Candesartan                                             | 1.01 (0.82 to 1.23)                                      | 1.00 (0.79 to 1.26)                                                                   |
| Losartan                                                | 0.96 (0.78 to 1.20)                                      | 0.97 (0.76 to 1.26)                                                                   |
| Valsartan                                               | 0.85 (0.70 to 1.04)                                      | 0.85 (0.68 to 1.07)                                                                   |
| <b>Secondary analysis #2:<br/>Stroke/TIA</b>            |                                                          |                                                                                       |
| Irbesartan (reference)                                  | 1.00                                                     | 1.00                                                                                  |
| Telmisartan                                             | 0.84 (0.66 to 1.08)                                      | 0.84 (0.64 to 1.10)                                                                   |
| Candesartan                                             | 0.98 (0.80 to 1.20)                                      | 1.01 (0.79 to 1.27)                                                                   |
| Losartan                                                | 0.90 (0.72 to 1.12)                                      | 0.93 (0.72 to 1.21)                                                                   |
| Valsartan                                               | 0.90 (0.74 to 1.09)                                      | 0.93 (0.74 to 1.17)                                                                   |

|                                                       |                     |                     |
|-------------------------------------------------------|---------------------|---------------------|
| <b>Secondary analysis #3:<br/>Heart Failure</b>       |                     |                     |
| Irbesartan (reference)                                | 1.00                | 1.00                |
| Telmisartan                                           | 0.80 (0.66 to 0.96) | 0.78 (0.63 to 0.95) |
| Candesartan                                           | 1.02 (0.88 to 1.19) | 1.09 (0.92 to 1.29) |
| Losartan                                              | 0.98 (0.84 to 1.15) | 1.06 (0.88 to 1.28) |
| Valsartan                                             | 0.87 (0.75 to 1.01) | 0.93 (0.78 to 1.10) |
| <b>Secondary analysis #4: All<br/>cause-mortality</b> |                     |                     |
| Irbesartan (reference)                                | 1.00                | 1.00                |
| Telmisartan                                           | 0.95 (0.83 to 1.09) | 0.93 (0.81 to 1.08) |
| Candesartan                                           | 1.05 (0.94 to 1.17) | 1.06 (0.93 to 1.20) |
| Losartan                                              | 0.99 (0.87 to 1.11) | 0.99 (0.86 to 1.14) |
| Valsartan                                             | 0.90 (0.80 to 1.00) | 0.90 (0.79 to 1.03) |
